# Supplementary material
Source: MDPI journal article supplement (https://www.mdpi.com/2079-6412/13/6/1014)
Supplement: s1 [file s1]

Article

# Enhancement of Dopamine Electrochemical Detection with Manganese Doped Crystalline Copper Oxide

Simona Guțoiu, Florina Pogăcean \*, Lidia Măgerușan, Maria Olimpia Miclăuș, Oana Grad, Ioan-Ovidiu Pană and Stela Pruneanu \*

National Institute for Research and Development of Isotopic and Molecular Technologies, 67-103 Donat Street, 400293 Cluj-Napoca, Romania

\* Correspondence: florina.pogacean@itim-cj.ro (F.P.); stela.pruneanu@itim-cj.ro (S.P.)

**Table S1.** Binding energies, line widths raw areas and normalized areas of the quantized core-level XPS lines.

| Line name                       | BE (eV)     | FWHM (eV) | Raw Area | Normalized area/(RSF*T*MFP) |
|---------------------------------|-------------|-----------|----------|-----------------------------|
| Cu 2p 3/2 Cu <sup>2+</sup>      | 933.78      | 2.584     | 114370   | 3886.15                     |
| Cu 2p 1/2 Cu <sup>2+</sup>      | 953.78      | 3.024     | 57185    | 3827.52                     |
| Cu 2p 3/2 Cu <sup>2+</sup> surf | 936.35      | 2.258     | 9963.58  | 339.177                     |
| Cu 2p 1/2 Cu <sup>2+</sup> sur  | 956.35      | 2.258     | 4981.79  | 334.101                     |
| sat1                            | 942.33      | 1.965     | -        | -                           |
| sat2                            | 944.49      | 3.041     | -        | -                           |
| sat 3                           | 963.17      | 1.77      | -        | -                           |
| sat4                            | 963.79      | 2.624     | -        | -                           |
| O 1s main                       | 529.82      | 2.384     | 24181.9  | 3762.95                     |
| O 1s surf.                      | 532.9       | 2.304     | 2281.9   | 355.443                     |
| Mn 2p 3/2                       | 640.67      | 3.452     | 966.369  | 49.5943                     |
| Mn 2p 1/2                       | 651.87      | 3.625     | 483.185  | 48.3589                     |
| Cu <sup>2+</sup> LMM (Auger)    | KE 317.7 eV | -         | -        | -                           |

RSF - relative sensitivity factor; T - transmission factor; MFP – mean free path.

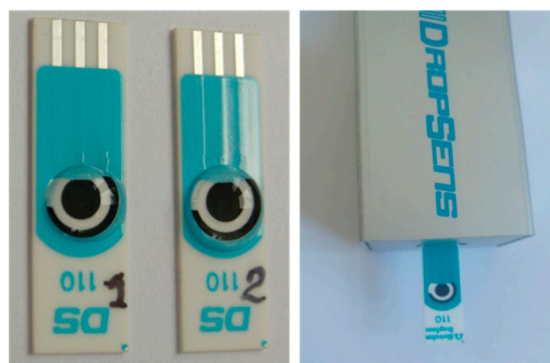

**Figure S1.** Optical images of SPE electrodes.

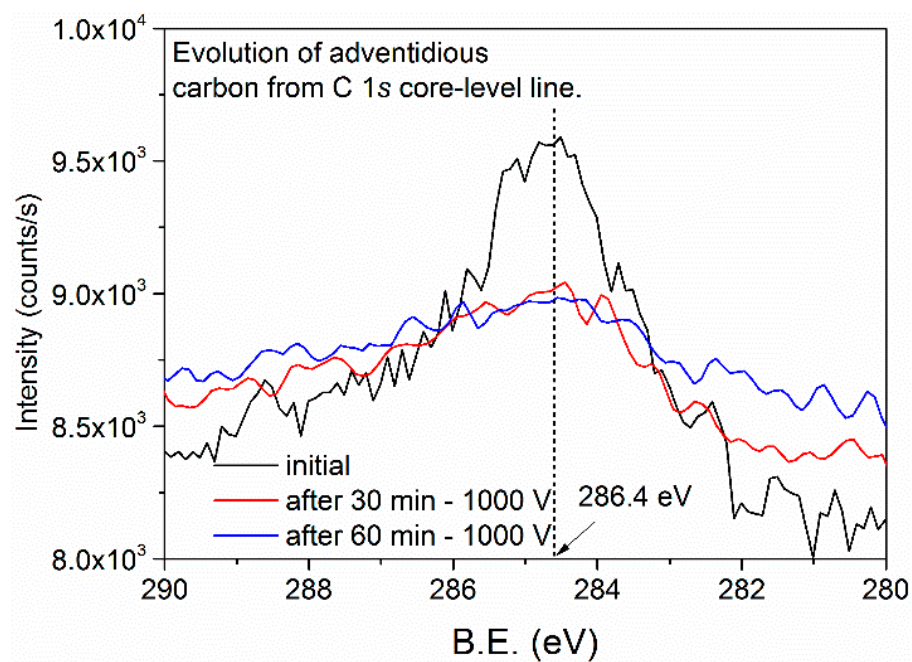

**Figure S2.** Evolution of the adventitious carbon after consecutive Ar ions etching of sample CuO:Mn.

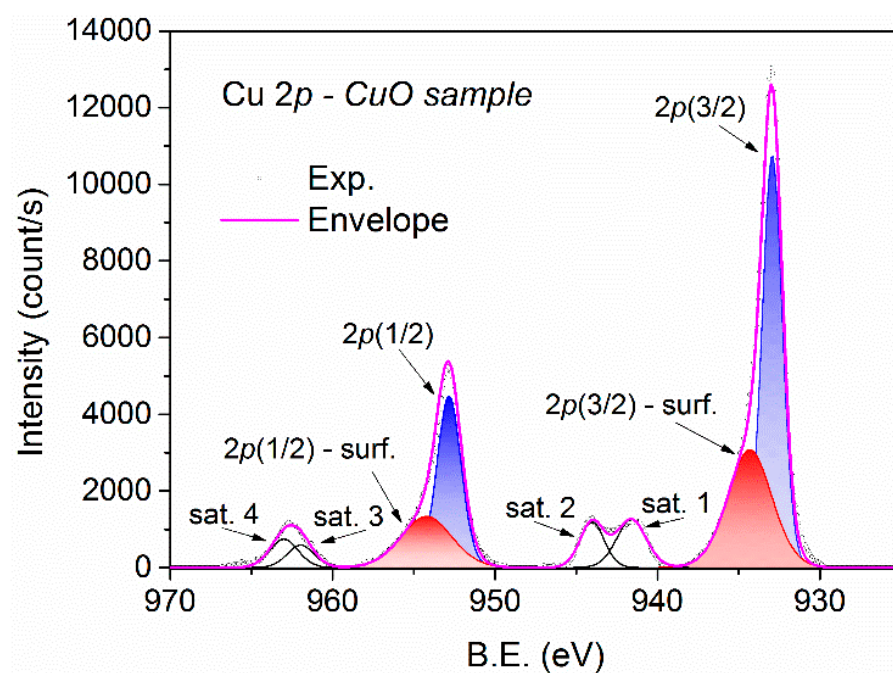

**Figure S3.** XPS recorded spectrum of Cu 2p core-level of CuO sample together with the corresponding deconvolutions and fitted curves.

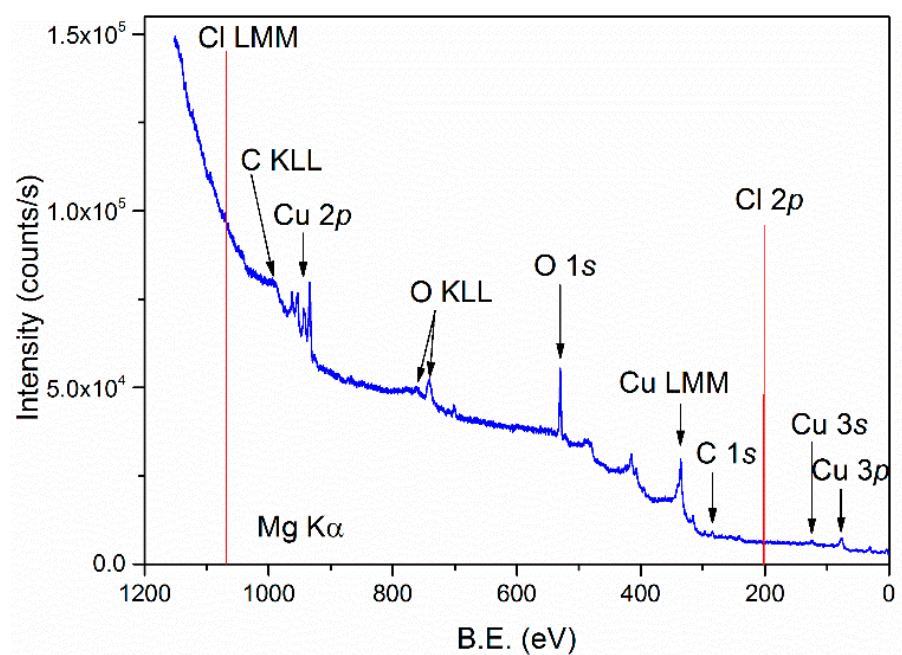

**Figure S4.** Survey spectrum of sample CuO. Red bars indicate the expected positions of the most intense Cl core-levels and Auger Cl LMM. These lines were not observed.

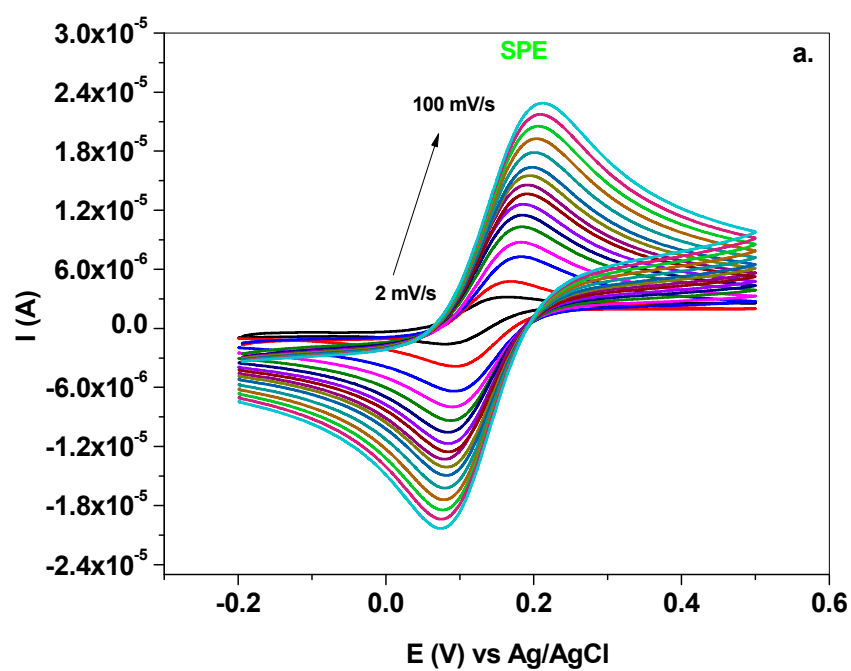

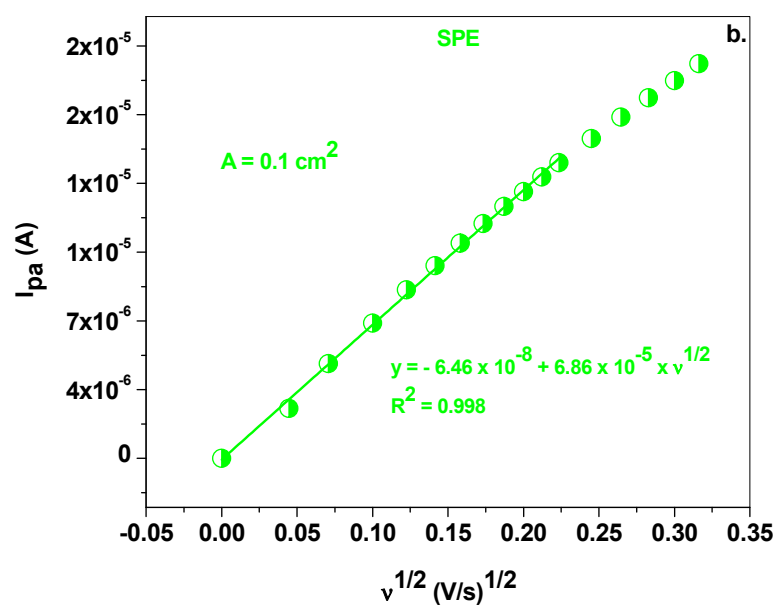

**Figure S5.** Cyclic voltammograms recorded with bare SPE with different scanning rates (2–100 mV/s) in solution containing  $10^{-3}$  M potassium hexacyanoferrate (II) and 0.2 M KCl supporting electrolyte (a); the plot of  $I_{pa}$  versus the square root of scan rate,  $v^{1/2}$  (b).

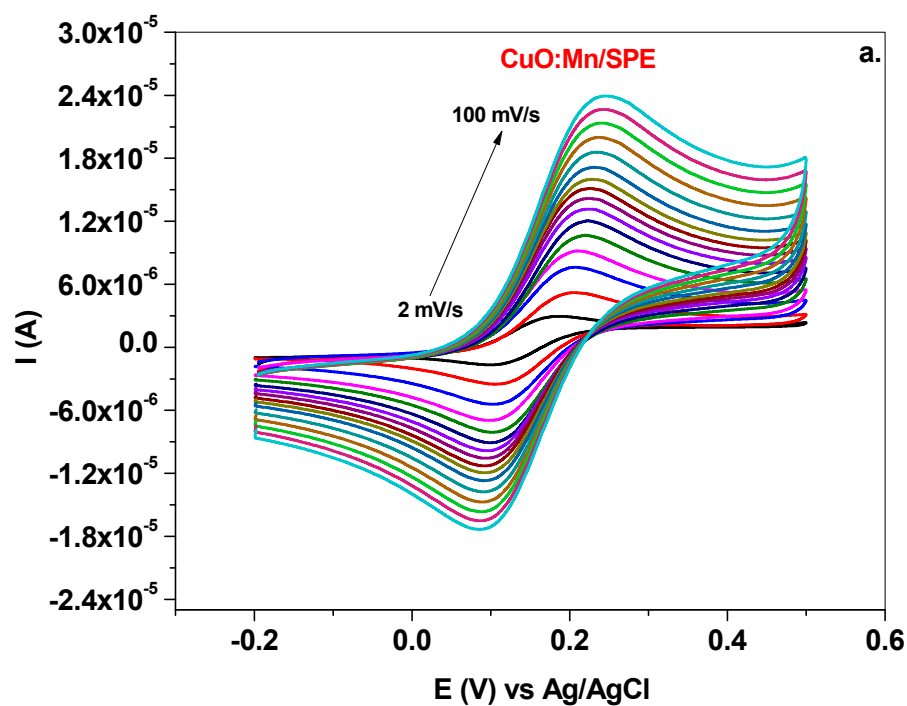

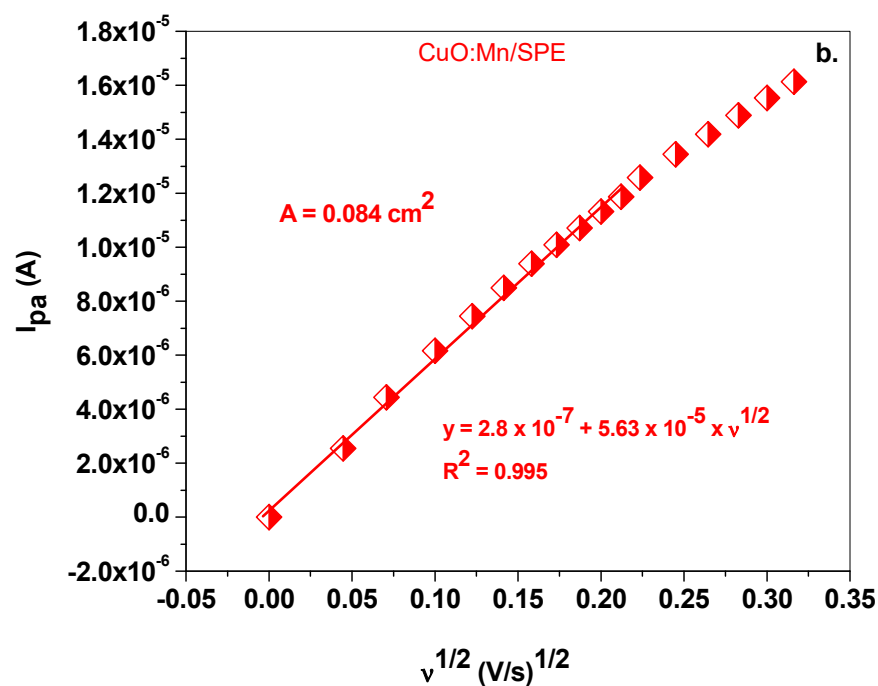

**Figure S6.** Cyclic voltammograms recorded with CuO:Mn/SPE with different scanning rates (2–100 mV/s) in solution containing  $10^{-3}$  M potassium hexacyanoferrate (II) and 0.2 M KCl supporting electrolyte (a); the plot of  $I_{pa}$  versus the square root of scan rate,  $v^{1/2}$  (b).

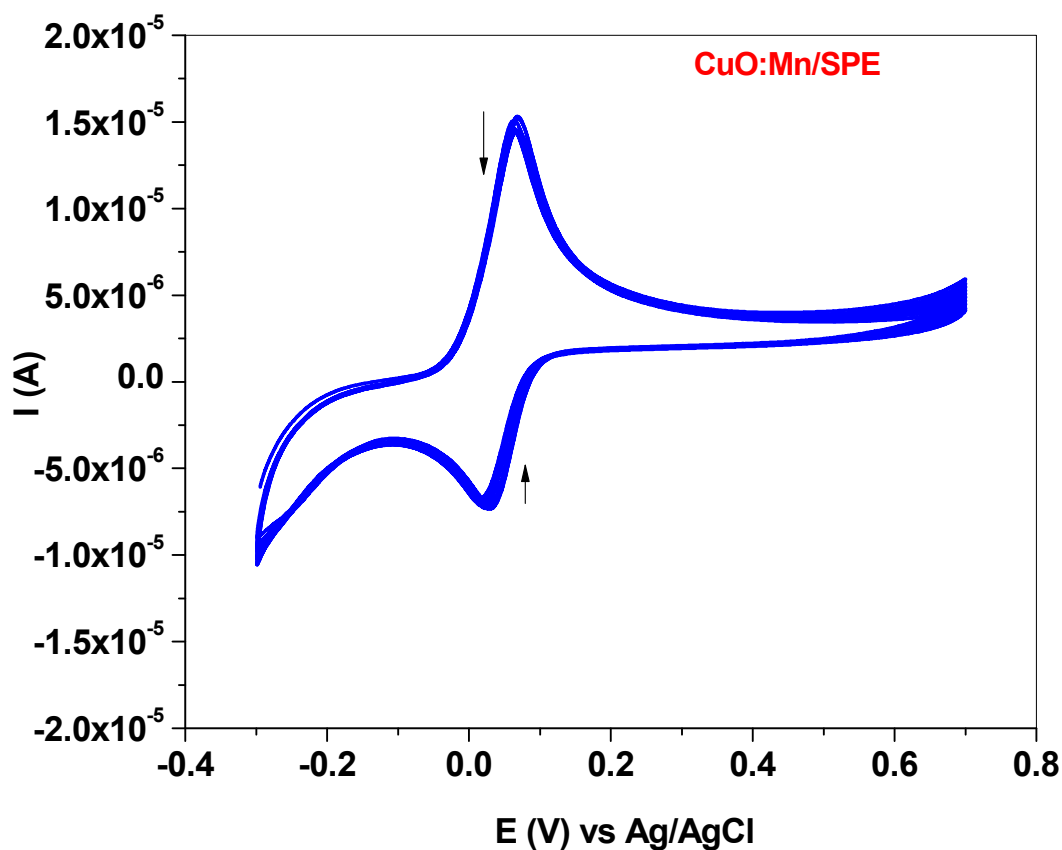

**Figure S7.** The stability of CuO:Mn/SPE, after successive scanning in solution containing  $10^{-4}$  M dopamine (pH 5 acetate); 20 scans with 10 mV/s scan rate.

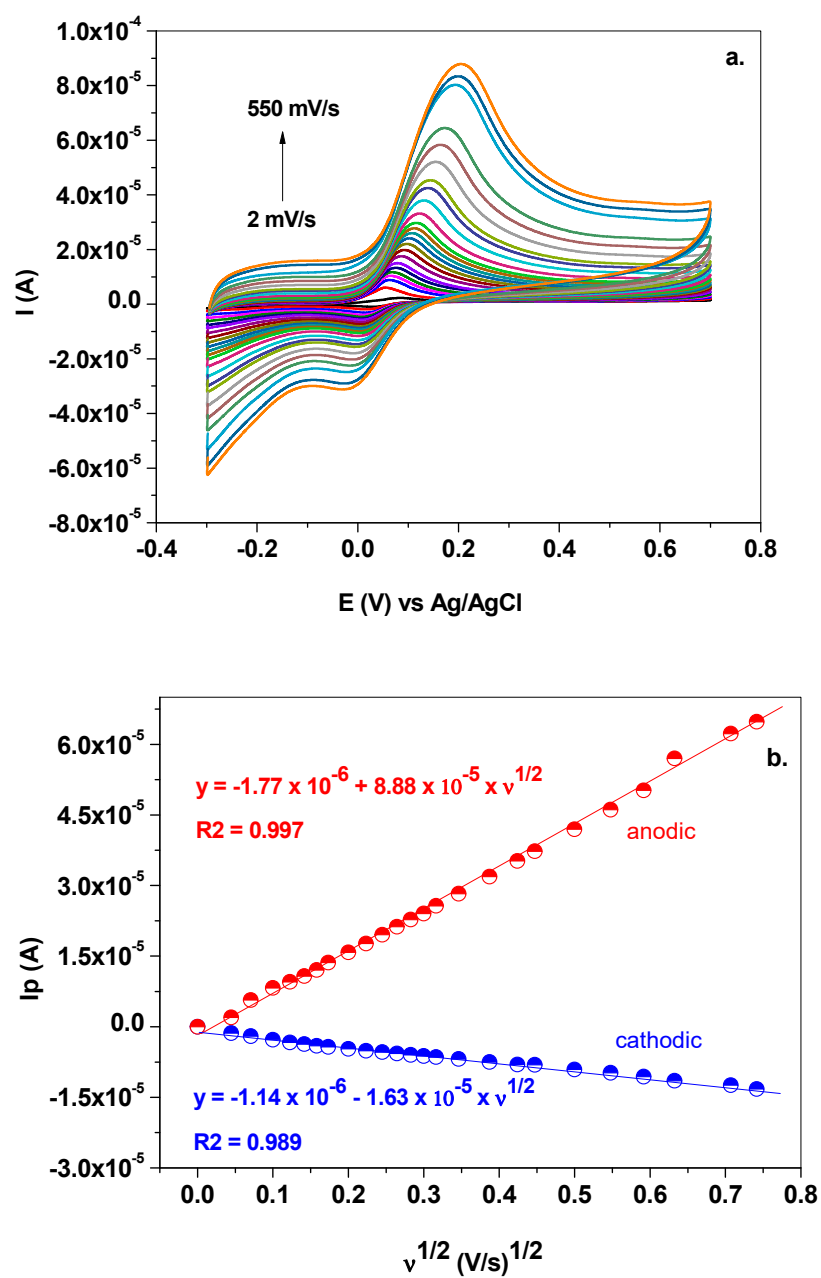

**Figure S8.** Cyclic voltammograms recorded with CuO:Mn/SPE in solution containing  $10^{-4}$  M dopamine (pH 5.0 acetate buffer), with increasing scan rate: 2–550 mV/s (a); The variation of the current peaks (anodic and cathodic) with the square root of scan rate (b).

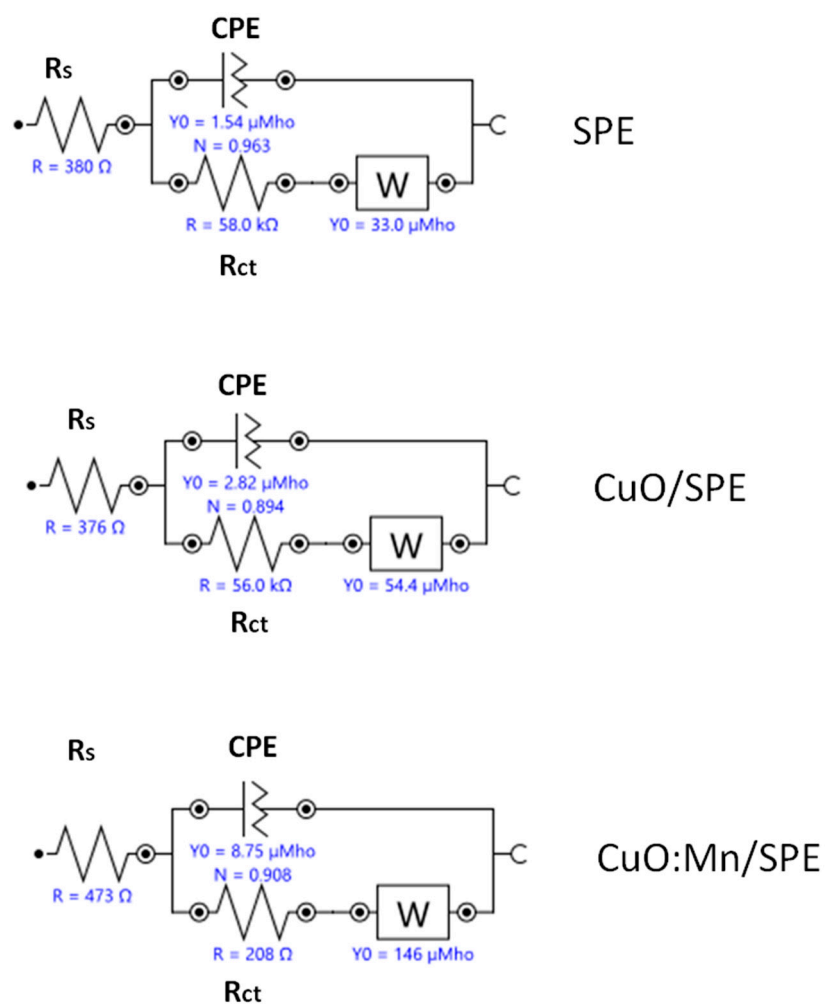

**Figure S9.** Equivalent electrical circuit employed to fit the EIS spectra of bare and modified SPE, CuO/SPE and CuO:Mn/SPE.

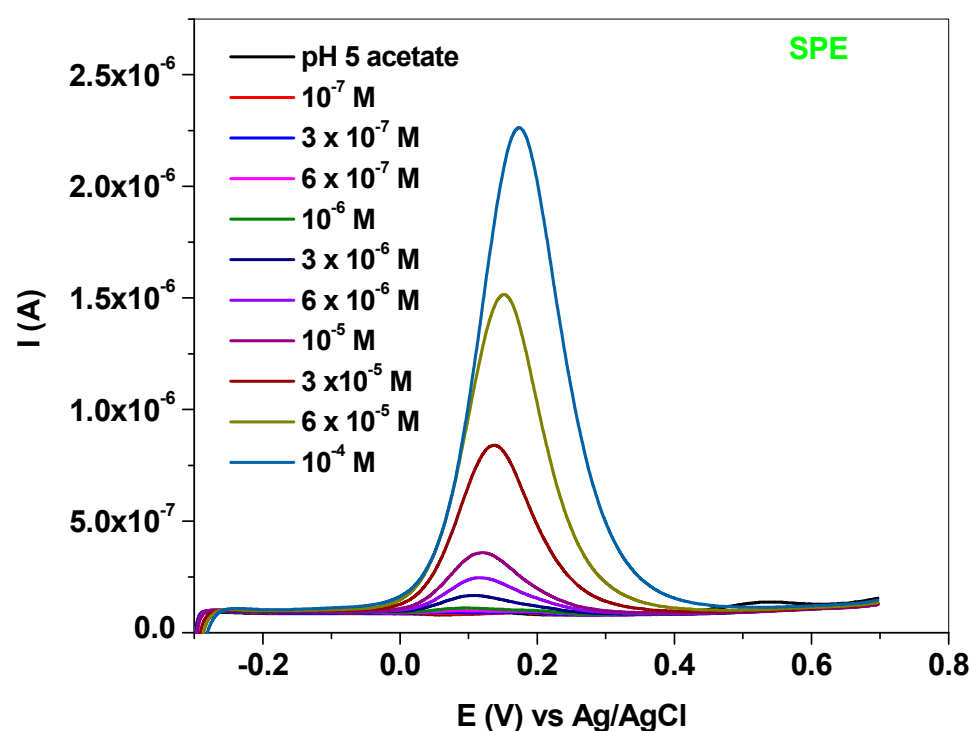

**Figure S10.** SW voltammograms recorded with bare SPE in solutions containing increasing concentrations of dopamine,  $10^{-7}$ – $10^{-4}$  M range (pH 5.0 acetate buffer); 10 mV/s scan rate.

**Disclaimer/Publisher's Note:** The statements, opinions and data contained in all publications are solely those of the individual author(s) and contributor(s) and not of MDPI and/or the editor(s). MDPI and/or the editor(s) disclaim responsibility for any injury to people or property resulting from any ideas, methods, instructions or products referred to in the content.
